# Supplementary material for: Interpopulational Variations of Odorant-Binding Protein Expression in the Black Cutworm Moth, Agrotis ipsilon
Source: MDPI journal article supplement (doi:10.3390/insects11110798), 2020-11-13

# A. AipsABPX

ggcgtggtaatggatgaggacatggcggagctggcgcgcatggtgcgcgagagctgcgtC  
 G V V M D E D M A E L A R M V R E S C V

gacgagacgggcgccgacgtgaagctggtggagaaggtcaacggcgggcgccgacctgatg  
 D E T G A D V K L V E K V N G G A D L M

gaggacgacaagctcaagtgctacatcaagtgcaccatggagacggccggcatgatgtcg  
 E D D K L K C Y I K C T M E T A G M M S

gacggcgaggtggacatcgaggcggtgatggcgctgctgccgcccgagatggcgggagcac  
 D G **E** V D I E A V M A L L P P E M A E H

aacggggccggcgctgaaatcgtgcggcacgcagcgcgcgctgacgactgcgacacggcc  
 N G P A L K S C G T Q R G A D D C D T A

tggaagacgcaggtgtgctggcagaacgcggaacaaggccgagtagtacttcctcatatagtc  
 W K T Q V C W Q **N** A N K A E Y F L I \*

ttcacacattattataacacatcctgtccttttgattaattttttattgaacatgttttatgtc  
 ataatttcttactccaaattaaaattctgataaattacatttttaaaaaaaaaaaaaaaaaaatct

# B.

AipsABPX

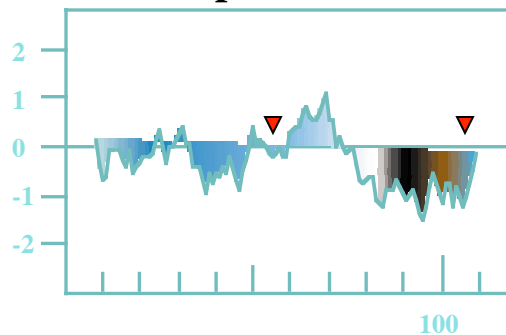

HvirABPX

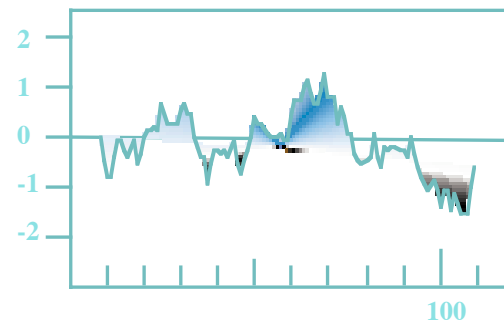

Supplement: s1 [file s1]
