# Supplementary figures and images for: Interpopulational Variations of Odorant-Binding Protein Expression in the Black Cutworm Moth, Agrotis ipsilon
Source: MDPI journal article supplement (doi:10.3390/insects11110798), 2020-11-13

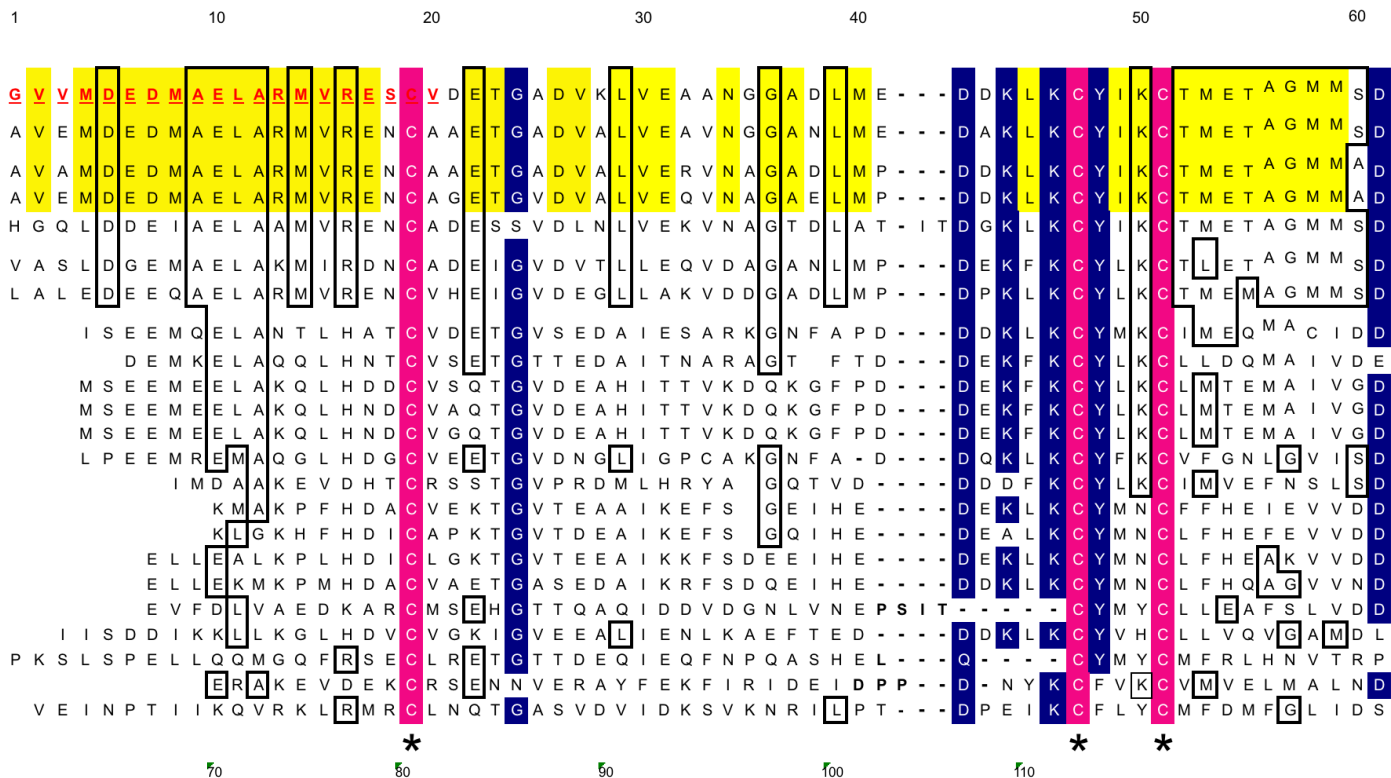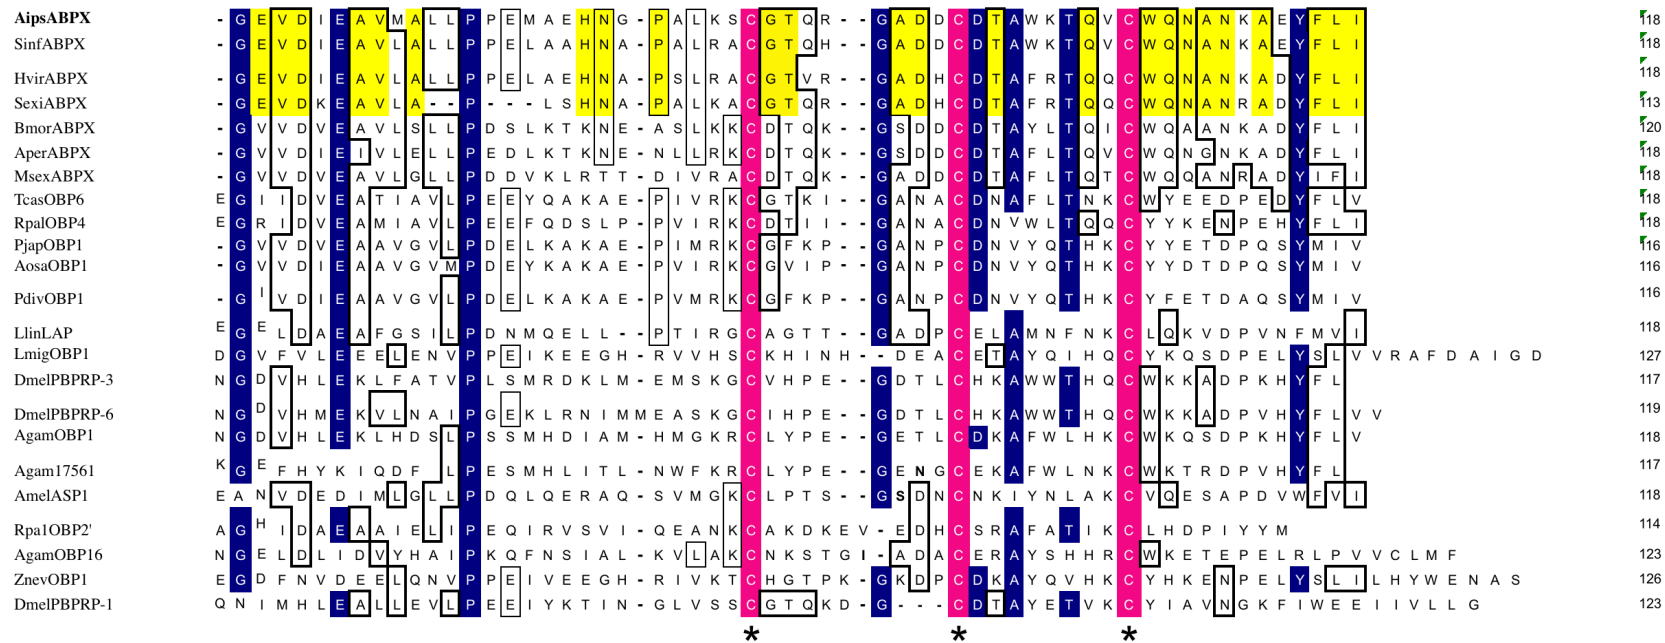

Supplement: s1 [file s1]
